# Supplementary material
Source: PubMed Central journal article supplement (PMC7339279)
Supplement: ajcr0010-1808-f2.pdf [file ajcr0010-1808-f2.pdf]

## CCRT for cervical SCC and ADC

**Supplemental Table 1.** Elixhauser comorbidities in patients with cervical squamous cell carcinoma and adenocarcinoma who received definitive concurrent chemoradiotherapy

| Variable                                        | Total      | SCC        | Adenocarcinoma | P value |
|-------------------------------------------------|------------|------------|----------------|---------|
|                                                 | (N = 3258) | (N = 2927) | (N = 331)      |         |
|                                                 | n (%)      | n (%)      | n (%)          |         |
| Congestive heart failure                        | 73 (2.2)   | 68 (2.3)   | 5 (1.5)        | .3437   |
| Cardiac arrhythmia                              | 71 (2.2)   | 66 (2.3)   | 5 (1.5)        | .3794   |
| Valvular disease                                | 34 (1.0)   | 34 (1.2)   | 0              | .0487   |
| Pulmonary disease                               | 104 (3.2)  | 92 (3.1)   | 12 (3.6)       | .6362   |
| Peripheral vascular disorders                   | 25 (0.8)   | -          | -              | .3061   |
| Hypertension                                    | 857 (26.3) | 784 (26.8) | 73 (22.1)      | .0639   |
| Paralysis                                       | 7 (0.2)    | 7 (0.2)    | 0              | .3731   |
| Other neurological disorders                    | 27 (0.8)   | 24 (0.8)   | 3 (0.9)        | .8695   |
| Diabetes                                        | 407 (12.5) | 357 (12.2) | 50 (15.1)      | .1292   |
| Hypothyroidism                                  | 15 (0.5)   | -          | -              | .6834   |
| Renal failure                                   | 67 (2.1)   | 59 (2.0)   | 8 (2.4)        | .6259   |
| Liver disease                                   | 40 (1.2)   | 35 (1.2)   | 5 (1.5)        | .6220   |
| Peptic ulcer disease (excluding bleeding)       | 115 (3.5)  | 105 (3.6)  | 10 (3.0)       | .5968   |
| Rheumatoid arthritis/collagen vascular diseases | 58 (1.8)   | 51 (1.7)   | 7 (2.1)        | .6272   |
| Coagulopathy                                    | 7 (0.2)    | -          | -              | .7176   |
| Fluid and electrolyte disorders                 | 34 (1.0)   | 29 (1.0)   | 5 (1.5)        | .3777   |
| Blood loss anemia                               | 34 (1.0)   | -          | -              | .4066   |
| Deficiency anemia                               | 39 (1.2)   | 35 (1.2)   | 4 (1.2)        | .9839   |
| Alcohol abuse                                   | 7 (0.2)    | 7 (0.2)    | 0              | .3731   |
| Depression                                      | 66 (2.0)   | 56 (1.9)   | 10 (3.0)       | .1751   |

**Supplemental Table 2.** Survival rates of all-cause mortality determined using the Kaplan-Meier method

|                | Patient no. | Event no. (%) | Survival rate |      |      | Survival time (months) |                 |
|----------------|-------------|---------------|---------------|------|------|------------------------|-----------------|
|                |             |               | 1 y           | 3 y  | 5 y  | Median                 | 95% CI          |
| All patients   |             |               |               |      |      |                        |                 |
| SCC            | 2927        | 1081 (36.9)   | 0.91          | 0.72 | 0.66 | .                      | -               |
| adenocarcinoma | 331         | 183 (55.3)    | 0.78          | 0.52 | 0.43 | 40.72                  | (33.67, 57.74)  |
| Stage I        |             |               |               |      |      |                        |                 |
| SCC            | 438         | 100 (22.8)    | 0.97          | 0.85 | 0.80 | .                      | -               |
| adenocarcinoma | 68          | 27 (39.7)     | 0.97          | 0.73 | 0.61 | 114.13                 | (47.21, -)      |
| Stage II       |             |               |               |      |      |                        |                 |
| SCC            | 1426        | 420 (29.5)    | 0.95          | 0.80 | 0.74 | 237.00                 | -               |
| adenocarcinoma | 149         | 71 (47.7)     | 0.83          | 0.59 | 0.50 | 63.97                  | (39.05, -)      |
| Stage III      |             |               |               |      |      |                        |                 |
| SCC            | 699         | 326 (46.6)    | 0.90          | 0.63 | 0.55 | 80.52                  | (64.10, 102.39) |
| adenocarcinoma | 65          | 43 (66.2)     | 0.68          | 0.41 | 0.33 | 25.67                  | (14.39, 40.13)  |
| Stage IV       |             |               |               |      |      |                        |                 |
| SCC            | 364         | 235 (64.6)    | 0.72          | 0.43 | 0.33 | 23.82                  | (20.00, 32.39)  |
| adenocarcinoma | 49          | 42 (85.7)     | 0.51          | 0.18 | 0.09 | 12.10                  | (10.23, 17.28)  |

## CCRT for cervical SCC and ADC

**Supplemental Table 3.** Characteristics of patients in propensity score-matched cohorts for cervical squamous cell carcinoma and adenocarcinoma who received definitive concurrent chemoradiotherapy

|                          |                     | SCC (N = 655) | Adenocarcinoma (N = 330) | <i>P</i> value |
|--------------------------|---------------------|---------------|--------------------------|----------------|
|                          |                     | <i>n</i> (%)  | <i>n</i> (%)             |                |
| Age, years               | 0-49                | 216 (33.0)    | 110 (33.3)               | 1.000          |
|                          | 50-59               | 222 (33.9)    | 111 (33.6)               |                |
|                          | 60-69               | 125 (19.1)    | 63 (19.1)                |                |
|                          | ≥ 70                | 92 (14.0)     | 46 (13.9)                |                |
| FIGO stage               | 1                   | 134 (20.5)    | 67 (20.3)                | 1.000          |
|                          | 2                   | 298 (45.5)    | 149 (45.2)               |                |
|                          | 3                   | 126 (19.2)    | 65 (19.7)                |                |
|                          | 4                   | 97 (14.8)     | 49 (14.8)                |                |
| Year of diagnosis        | 2007-2009           | 203 (31.0)    | 104 (31.5)               | .4292          |
|                          | 2010-2012           | 204 (31.1)    | 94 (28.5)                |                |
|                          | 2013-2015           | 248 (37.9)    | 132 (40.0)               |                |
| RT cumulative dose       | < 50 Gy             | 276 (42.1)    | 142 (43.0)               | .7502          |
|                          | ≥ 50 Gy             | 379 (57.9)    | 188 (57.0)               |                |
| Platinum cumulative dose | < 500 mg            | 315 (48.1)    | 158 (47.9)               | .9641          |
|                          | ≥ 500 mg            | 340 (51.9)    | 172 (52.1)               |                |
| IC Brachytherapy dose    | No IC Brachytherapy | 115 (17.6)    | 69 (20.9)                | .3535          |
|                          | < 2500 cGy          | 238 (36.3)    | 114 (34.5)               |                |
|                          | ≥ 2500 cGy          | 302 (46.1)    | 147 (44.5)               |                |
| CCI scores               | 0                   | 500 (76.3)    | 244 (73.9)               | .4451          |
|                          | 1                   | 88 (13.4)     | 53 (16.1)                |                |
|                          | ≥ 2                 | 67 (10.2)     | 33 (10.0)                |                |
| Income                   | < 18,000 NTD        | 167 (25.5)    | 84 (25.5)                | .1689          |
|                          | 18,000-22,500 NTD   | 204 (31.1)    | 95 (28.8)                |                |
|                          | 22,500-30,000 NTD   | 77 (11.8)     | 51 (15.5)                |                |
|                          | ≥ 30,000 NTD        | 207 (31.6)    | 100 (30.3)               |                |
| Hospital type            | Medical center      | 499 (76.2)    | 248 (75.2)               | .6792          |
|                          | others              | 156 (23.8)    | 82 (24.8)                |                |
| Hospital location        | North               | 304 (46.4)    | 153 (46.4)               | .9941          |
|                          | Middle              | 170 (26.0)    | 87 (26.4)                |                |
|                          | South/East          | 181 (27.6)    | 90 (27.3)                |                |

Gy, gray; SCC, squamous cell carcinoma; ADC, adenocarcinoma; FIGO, International Federation of Gynecology and Obstetrics; EBRT, external beam radiotherapy; CCI, Charlson comorbidity index; mg, milligrams; HR, hazard ratio; CI, confidence interval; NTD, New Taiwan dollar; IC, intracavitary; aHR, adjusted hazard ratio.

## CCRT for cervical SCC and ADC

**Supplemental Table 4.** Results of Cox proportional hazards regression analysis of propensity score-matched cohorts and the risk of all-cause mortality, locoregional recurrence, and distant metastasis among patients with cervical adenocarcinoma or squamous cell carcinoma who received definitive concurrent chemoradiotherapy

| FIGO stage   | Event                   | Pathologic type | Patient no. | Event no. (%) | Adjusted HR* (95% CI) | P value |         |
|--------------|-------------------------|-----------------|-------------|---------------|-----------------------|---------|---------|
| All patients | All-cause mortality     | SCC             | 655         | 211 (32.2)    | ref.                  | < .0001 |         |
|              |                         | adenocarcinoma  | 330         | 183 (55.5)    | 2.39 (1.95-2.92)      |         |         |
|              | Locoregional recurrence | SCC             | 655         | 80 (12.2)     | ref.                  |         | .0004   |
|              |                         | adenocarcinoma  | 330         | 58 (17.6)     | 1.86 (1.32-2.61)      |         |         |
|              | Distant metastasis      | SCC             | 655         | 97 (14.8)     | ref.                  |         | < .0001 |
|              |                         | adenocarcinoma  | 330         | 75 (22.7)     | 2.00 (1.47-2.71)      |         |         |
| Stage I      | All-cause mortality     | SCC             | 134         | 29 (21.6)     | ref.                  | .0009   |         |
|              |                         | adenocarcinoma  | 67          | 27 (40.3)     | 2.56 (1.47-4.48)      |         |         |
|              | Locoregional recurrence | SCC             | 134         | 12 (9.0)      | ref.                  |         | .0066   |
|              |                         | adenocarcinoma  | 67          | 14 (20.9)     | 3.19 (1.38-7.36)      |         |         |
|              | Distant metastasis      | SCC             | 134         | 16 (11.9)     | ref.                  |         | .3605   |
|              |                         | adenocarcinoma  | 67          | 11 (16.4)     | 1.46 (0.65-3.32)      |         |         |
| Stage II     | All-cause mortality     | SCC             | 298         | 69 (23.2)     | ref.                  | < .0001 |         |
|              |                         | adenocarcinoma  | 149         | 71 (47.7)     | 2.91 (2.07-4.08)      |         |         |
|              | Locoregional recurrence | SCC             | 298         | 44 (14.8)     | ref.                  |         | .0378   |
|              |                         | adenocarcinoma  | 149         | 29 (19.5)     | 1.66 (1.03-2.67)      |         |         |
|              | Distant metastasis      | SCC             | 298         | 37 (12.4)     | ref.                  |         | < .0001 |
|              |                         | adenocarcinoma  | 149         | 36 (24.2)     | 2.62 (1.64-4.18)      |         |         |
| Stage III-IV | All-cause mortality     | SCC             | 223         | 113 (50.7)    | ref.                  | < .0001 |         |
|              |                         | adenocarcinoma  | 114         | 85 (74.6)     | 2.06 (1.54-2.76)      |         |         |
|              | Locoregional recurrence | SCC             | 223         | 24 (10.8)     | ref.                  |         | .0892   |
|              |                         | adenocarcinoma  | 114         | 15 (13.2)     | 1.80 (0.91-3.55)      |         |         |
|              | Distant metastasis      | SCC             | 223         | 44 (19.7)     | ref.                  |         | .0220   |
|              |                         | adenocarcinoma  | 114         | 28 (24.6)     | 1.79 (1.09-2.95)      |         |         |

\*Propensity scores were estimated using a logistic regression model with the variables of age, FIGO stage, year of diagnosis, RT cumulative dose, platinum cumulative dose, IC Brachytherapy dose, CCI score, income, hospital type, and hospital location. \*Patients were 1:2 matched with the same stage, age group, and caliper (logit PS) within 0.5. Gy, gray; SCC, squamous cell carcinoma; ADC, adenocarcinoma; FIGO, International Federation of Gynecology and Obstetrics; EBRT, external beam radiotherapy; CCI, Charlson comorbidity index; mg, milligrams; HR, hazard ratio; CI, confidence interval; NTD, New Taiwan dollar; IC, intracavitary; aHR, adjusted hazard ratio.

## CCRT for cervical SCC and ADC

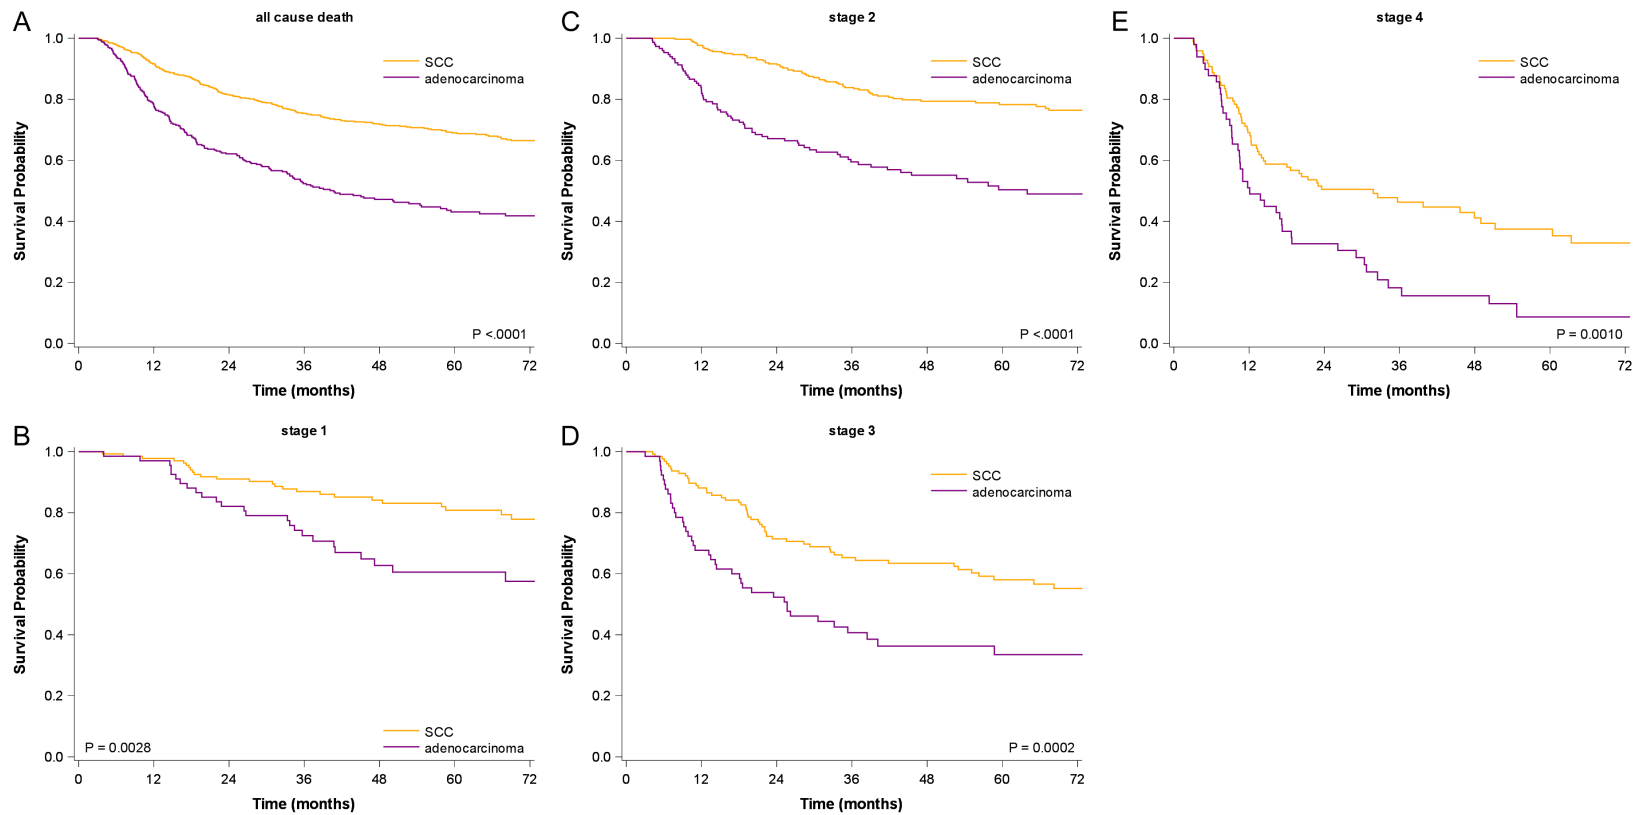

**Supplemental Figure 1.** Survival curves for all-cause mortality determined using the Kaplan-Meier method for propensity score-matched cohort at (A) stage I-IV (B) stage I (C) stage II (D) stage III (E) stage IV.
